# Supplementary material for: Silver cyanamide nanoparticles decorated ultrathin graphitic carbon nitride nanosheets for enhanced visible-light-driven photocatalysis
Source: Royal Society of Chemistry journal article supplement (doi:10.1039/c7cy02325a), 2018-01-01
Supplement: c7cy02325a1.pdf [file c7cy02325a1.pdf]

# Supporting Information

## **Silver cyanamide nanoparticles decorated ultrathin graphitic carbon nitride nanosheets for enhanced visible-light-driven photocatalysis**

Bingquan Jia<sup>a,b</sup>, Wei Zhao<sup>\*,a</sup>, Linggang Fan<sup>a,b</sup>, Guoheng Yin<sup>a,b</sup>, Yuan Cheng<sup>a</sup>,  
Fuqiang Huang<sup>\*,a,b</sup>

<sup>a</sup> CAS Key Laboratory of Materials for Energy Conversion and State Key Laboratory of High Performance Ceramics and Superfine Microstructure, Shanghai Institute of Ceramics, Chinese Academy of Sciences, Shanghai 200050, P.R. China

<sup>b</sup> Beijing National Laboratory for Molecular Sciences and State Key Laboratory of Rare Earth Materials Chemistry and Applications, College of Chemistry and Molecular Engineering, Peking University, Beijing 100871, China

\* E-mail: zhaowei220@mail.sic.ac.cn; huangfq@mail.sic.ac.cn

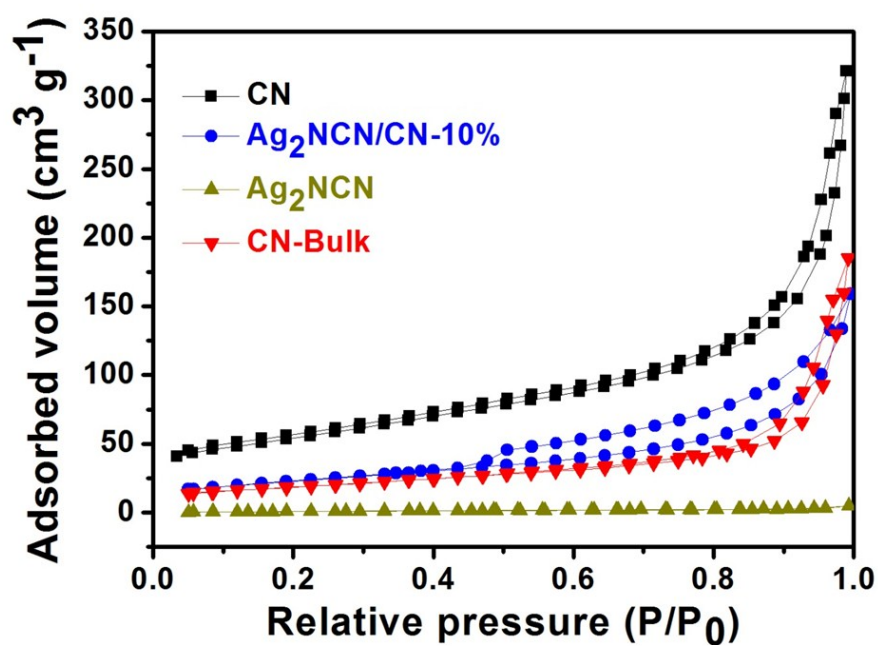

Figure. S1  $N_2$  adsorption-desorption isotherm of CN,  $Ag_2NCN/CN-10\%$ ,  $Ag_2NCN$  and CN-Bulk.

| Sample            | $S_{BET}$ ( $m^2/g$ ) | Pore volume ( $cm^3/g$ ) | Average pore diameter (nm) |
|-------------------|-----------------------|--------------------------|----------------------------|
| CN-Bulk           | 67.3107               | 0.287031                 | 16.23                      |
| CN                | 190.2445              | 0.501079                 | 10.48                      |
| $Ag_2NCN/CN-10\%$ | 83.4611               | 0.245541                 | 10.88                      |
| $Ag_2NCN$         | 4.2327                | 0.007                    | 8.24                       |

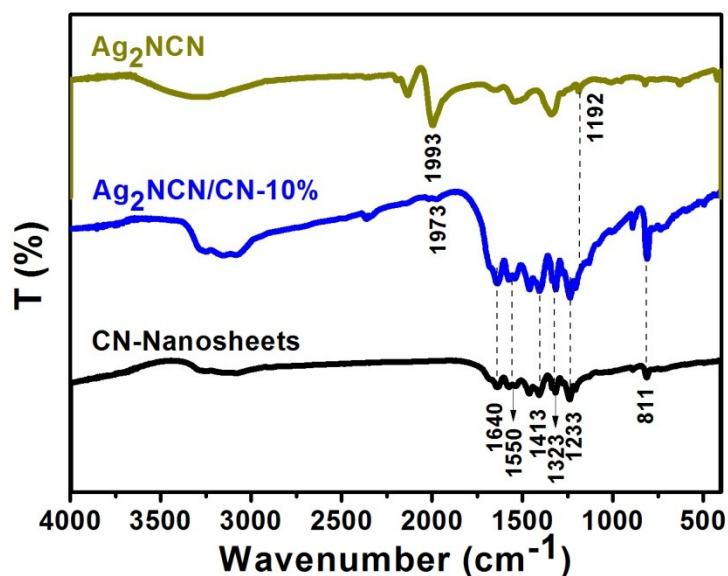

Figure. S2 FT-IR spectra of the  $\text{Ag}_2\text{NCN}$ ,  $\text{Ag}_2\text{NCN/CN-10\%}$  and CN.

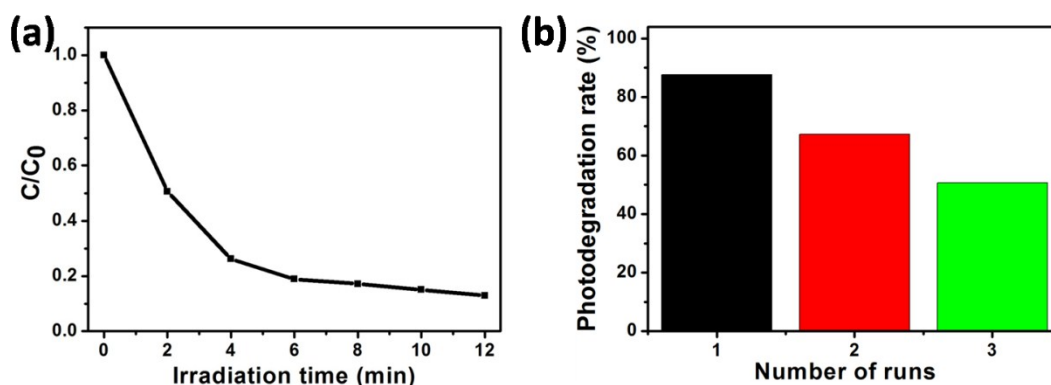

Figure. S3 (a) The photocatalytic degradation of MO by catalyst  $\text{Ag}_3\text{PO}_4/\text{CN-10\%}$  and (b) its bar plot for 3 cycles under visible light.

The fabrication process of  $\text{Ag}_3\text{PO}_4/\text{CN-10\%}$  was as follows: 200 mg  $\text{g-C}_3\text{N}_4$  nanosheets was added into 80 ml deionized water. The ultrasonic dispersion is needed to get a uniform system before 5 ml  $\text{AgNO}_3$  solution (0.318 M) was added into the  $\text{g-C}_3\text{N}_4$  dispersion dropwise. Then the dispersion was stirring for 30 min, and 0.016 M  $\text{Na}_3\text{PO}_4$  (15 ml) was allowed to drop into it followed by another 2 hours' stirring. After washing and drying,  $\text{Ag}_3\text{PO}_4/\text{CN-10\%}$  was obtained.

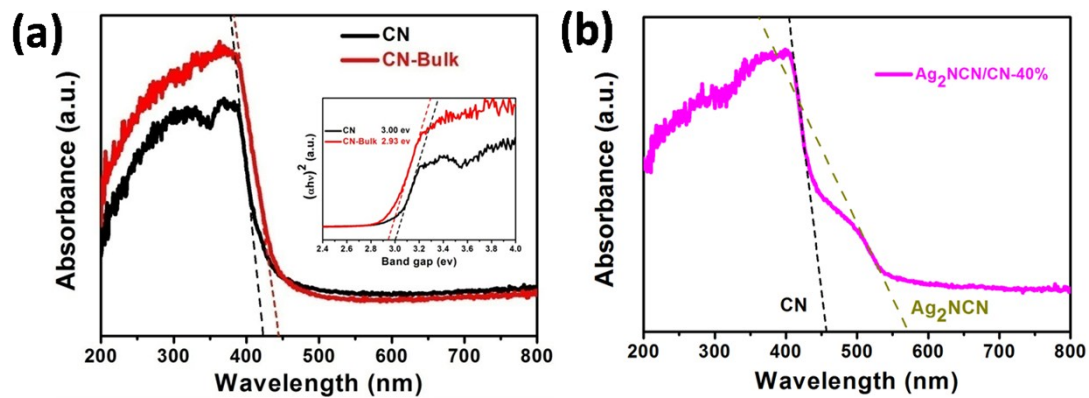

Figure. S4 UV- vis DRS of (a) g-C<sub>3</sub>N<sub>4</sub> and (b) Ag<sub>2</sub>NCN/CN-40%. The insert is estimated band gap of CN, CN-Bulk.

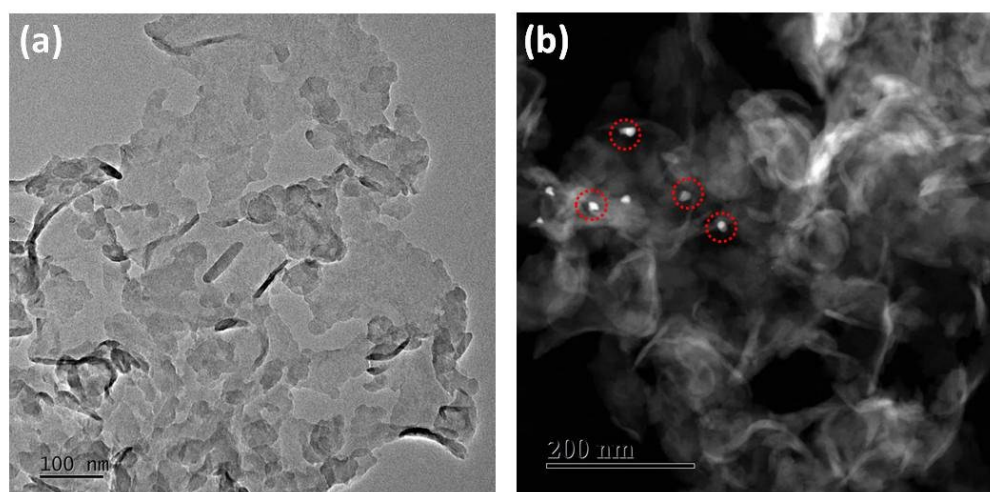

Figure. S5 (a) TEM bright field image and (b) dark field image of Ag<sub>2</sub>NCN/CN-10% after 5 cycles.
